# Supplementary material
Source: publisher figshare collection journal article supplement (https://karger.figshare.com/ndownloader/files/22645166)
Supplement: Supplementary file 1 [file 22645166]

**ABBREVIATIONS**

FVC forced vital capacity

MEP maximal expiratory pressure

MIP maximal inspiratory pressure

SNIP sniff nasal inspiratory pressure

FRC functional residual capacity

TLC total lung capacity

PCF peak cough flow

FEF forced expiratory flow

PEF peak expiratory flow

LLN lower limit of normal

Pdi transdiaphragmatic pressure

Pes esophageal pressure

Pgas gastric pressure
